# Supplementary material for: Diurnal regulation of photosynthetic light absorption, electrontransport and carbon fixation in two contrasting oceanicenvironments
Source: Copernicus journal article supplement (doi:10.5194/bg-2018-524), 2019-01-17
Supplement: Supplementary file 1 [file bg-2018-524-supplement.zip]

## S1. Overview of samples collected at each station

---

Table S1.1: Overview of data available for each time-point of the 48 hour diurnal experiment at OCE17. x's denote time points when a particular variable was measured.

| Time Point | Local Time | HPLC | QFT | FRRF | <sup>14</sup> C | AC-s | BB3 |
|------------|------------|------|-----|------|-----------------|------|-----|
| 1          | 2:00       | x    | x   | x    | x               | x    | x   |
| 2          | 4:00       |      |     | x    |                 | x    | x   |
| 3          | 6:00       | x    | x   | x    | x               | x    | x   |
| 4          | 8:00       |      |     | x    |                 | x    | x   |
| 5          | 10:00      | x    | x   | x    | x               | x    | x   |
| 6          | 12:00      |      |     | x    |                 | x    | x   |
| 7          | 14:00      | x    | x   | x    | x               | x    | x   |
| 8          | 16:00      |      |     | x    |                 | x    | x   |
| 9          | 18:00      | x    | x   | x    | x               | x    | x   |
| 10         | 20:00      |      |     | x    |                 | x    | x   |
| 11         | 21:00      | x    | x   | x    | x               | x    | x   |
| 12         | 22:00      |      |     | x    |                 | x    | x   |
| 13         | 0:00       | x    | x   | x    | x               | x    | x   |
| 14         | 2:00       |      |     | x    |                 | x    | x   |
| 15         | 4:00       | x    | x   | x    | x               | x    | x   |
| 16         | 6:00       |      |     | x    |                 | x    | x   |
| 17         | 8:00       | x    | x   |      | x               | x    | x   |
| 18         | 10:00      |      |     | x    |                 | x    | x   |
| 19         | 12:00      | x    | x   | x    | x               | x    | x   |
| 20         | 14:00      |      |     | x    |                 | x    | x   |
| 21         | 16:00      | x    | x   | x    | x               | x    | x   |
| 22         | 18:00      |      |     | x    |                 | x    | x   |
| 23         | 20:00      | x    | x   |      | x               | x    | x   |
| 24         | 22:00      |      |     | x    |                 | x    | x   |

Table S1.2: Overview of data available for each time-point of the 24 hour diurnal experiment at OSP14. x's denote time points when a particular variable was measured.

| Time Point | Local Time | HPLC | QFT | FRRF | <sup>14</sup> C |
|------------|------------|------|-----|------|-----------------|
| 1          | 5:00       | x    | x   | x    | x               |
| 2          | 8:00       |      | x   | x    | x               |
| 3          | 11:00      | x    | x   | x    | x               |
| 4          | 14:00      |      | x   | x    | x               |
| 5          | 17:00      | x    | x   | x    | x               |
| 6          | 21:00      |      | x   | x    | x               |
| 7          | 0:00       | x    | x   | x    | x               |
| 8          | 2:00       |      | x   | x    | x               |
