# Supplementary material for: Diurnal regulation of photosynthetic light absorption, electrontransport and carbon fixation in two contrasting oceanicenvironments
Source: Copernicus journal article supplement (doi:10.5194/bg-2018-524), 2019-01-17
Supplement: Supplementary file [file bg-2018-524-AC1-supplement.pdf]

Reply to anonymous referee #1, in blue.

General comments:

The manuscript by Schuback and Tortell examined the variability of several parameters including phytoplankton absorption, FRRF-ETR and primary productivity over 48 hours in the coastal subarctic NE Pacific, which I believe should be a very hard work. Moreover, they also compared results of this study with their previous one from an iron limited area, to give the idea that the potential effects of iron limitation on photosynthesis. They showed the first time that NPQ is a good factor for estimating both  $\Phi_{e,C}$  and  $\Phi_C$ , which could contribute to FRRF, numerical models and remote sensing based primary production estimates. It seems that the authors' data set, results and supplement files are very well prepared and is comprehensive enough to address these aspects of light absorption, electron transport and carbon fixation diurnal regulation.

So I do not notice any major concerns with the manuscript, but have some concerns and questions I want to ask/suggest.

We thank the referee for their kind words and answer all specific comments below.

Specific comments:

Page 1, line 4: what is NE Pacific?

We changed the text to "North-East Subarctic Pacific".

Page 1 line 19-20: the meaning of this sentence is not very clear for me, so author is saying, comparing to the coastal waters, although under iron-limitation there was a significant reduction of iron-rich photosynthetic units per chlorophyll a (this I can understand), the electron transport per photosystem II is still higher. (Is it right?) If so what cause this higher ETR?

The referees understanding is correct, and we appreciate that higher ETR under iron limitation appears counter-intuitive. As explained in much detail throughout the manuscript:

- Under iron-limited conditions, more chlorophyll a is associated with each (iron-rich) photosystem II. This allows cells to reduce cellular iron demand by increasing light absorption and energy transport to each reaction center II (RCII).
- As a direct consequence, the rate of charge separation per RCII ( $ETR_{RCII}$ ) increases under iron limitation. It can be visualized as 'funneling' more electrons through the same RCII in order to reduce cellular iron demand.

The important point is that if ETR was normalized to [chl a], the rate would of course be lower in the iron-limited region.

We revised the manuscript to make this point clearer in the abstract, and note that it is explained in much detail within the manuscript.

Page 1, line 20: put PSII after photosystem II?, because PSII will soon show up in the caption of Fig.1

Done.

Page 2, line 11: I think Fig.1 is a very nice schematic plot, just two suggestions 1) Make difference for  $a^*_{phy}$  and  $a^*_{ppc}$ ,  $a^*_{psp}$ , now it seems these three parameters are equal., 2) I think not very necessary to put  $^{14}C$  here, just C-uptake is OK.

The distinction between  $a_{phy}$  and  $a_{ppc}$  and  $a_{psp}$  was described in the original figure legend. We have further revised the figure to read  $a_{phy} = a_{ppc} + a_{psp}$ . “ $^{14}C$ -uptake” was replaced by “C-fixation”, as suggested. We have now indicated in the revised legend that C-fixation was estimated by  $^{14}C$ -uptake.

Page 2, line 12: maybe add some references here?

We added references Huner, Öquist, & Sarhan (1998).

Page 5, line 25: not very clear why here  $a_{psp}$  is weighted to FRRF excitation LED, not in situ light?

This was done because  $\sigma_{PSII}$ , measured by FRRF, is specific to the FRRF excitation LED wavelengths (470 nm) used in this instrument. When estimating  $1/n_{PSII}$  from  $\sigma_{PSII}$  and  $a_{psp}$ , both of these measurements have to be specific to light of the same wavelengths. One can therefore either weight both to in situ light, or weight  $a_{psp}$  to FRRF excitation LED. The result would be the same.

Page 5, line 26: using assumption that ratio of PSII:PSI =1 whether will affect the accuracy of  $n_{PSII}$  calculation? especially for those samples under iron limitation, which should have decreased PSII abundance. Can authors provide the general range of PSII:PSI for samples with/without iron stress?

The manuscript actually does not state that we assume PSII:PSI to be equal. Rather, we assume that 50% of absorbed energy goes to RCII, which does not imply a 1:1 ratio of the two reaction centers.

The referee is correct in pointing out that iron limitation can affect PSII:PSI ratios significantly. For example (Strzepek and Harrison, 2004) show that open ocean diatom PSII:PSI ratios can be as low as 11:1, while coastal diatoms show ratios of 2:1. This does not imply that in the open ocean diatom 10 times more of the absorbed energy will end up at RCII, when compared to RCI. This would be a serious problem, given that the two reaction centers work in series.

The differential allocation of absorbed light energy between RCII and RCI at different wavelengths can be estimated by comparing  $a_{psp}$  spectra and 730 nm fluorescence excitation spectra. The approach, explained in more detail in Suggett et al. (2004), relies on the fact that fluorescence is generally only emitted from pigments associated with PSII. Using this approach, Suggett et al. show that differential allocation of absorbed energy depends on taxonomy rather than growths conditions, and does not vary by more than 20%.

We added a reference to the review by (Kromkamp and Forster, 2003), which advises the use of 50% energy partitioning between PSII and PSI, as well as a sentence pointing out the potential error introduced by this assumption.

Page 6, line16: I feel eq.2 is very hard to follow, here are some questions

1) where is the  $E_{IS}(\lambda)$  in Eq.(2) ?

$E_{IS}(\lambda)$  was present in Eq.(2), which has been copied below from the original manuscript. We are not sure what the reviewer means.

$$E_{IS} = E_{LED} \cdot \frac{\sum_{400}^{700} a_{phy}(\lambda) E_{LED}(\lambda) \cdot \sum_{400}^{700} E_{IS}(\lambda)}{\sum_{400}^{700} a_{phy}(\lambda) E_{IS}(\lambda) \cdot \sum_{400}^{700} E_{LED}(\lambda)}$$

- 2) Maybe I missed somewhere but I cannot find where you mention that  $E_{is}(\lambda)$  (i.e.  $E_{is}$  at each wavelength) was measured? or you measured  $E_{0+}(\lambda)$ ?, then using it to estimate  $E_{is}(\lambda)$ . Sorry, just cannot find the related information.

The spectral distribution of light at 5 m depths ( $E_{is}(\lambda)$ ) was estimated as described in Schuback et al. (2016, 2017). This information was provided in the original manuscript two lines above Eq. (2).

- 3) not very clear why absolute values of light intensity for 14C P-E curve need to be corrected? And how can you correct light? I think you can only correct 14C-uptake rates, because C uptake rate measured under indoor LED light may differ with that under in situ natural light

The point is that we corrected the absolute value of PAR (i.e. light intensity integrated over the spectral range 400-700 nm) before fitting PI curves (i.e. modifying the x axis). This results in different curve fit parameters for light-dependent 14C uptake.

Page 6, line24: a little confused that why  $\Phi_c\text{-max} = \alpha \cdot 14C / \Delta A \cdot \text{phy}$ ? is not  $=P_{\text{max}}\text{-}14C$

$/ \Delta A \cdot \text{phy}$ ?

We understand that this result may seem a little counter-intuitive. However, as discussed throughout the manuscript, the maximum efficiency of photosynthesis is achieved under light limitation. We have further emphasised this point in the revised version of the manuscript.

Page 6, line 20-25: I would suggest authors adding equations for how to calculate of ETR per second, but C-uptake is per hour. And it is same to  $\Phi_c$ . I think it will help to understand the meaning of  $\Phi_e$ ,  $\Phi_c$  if authors can provide equations and parameters with unit here

We agree with the referee and have added equations 3, 4, 5, and 6.

Page 7, line8-9: I think the datasets Graff (2015) used for developing their bbp-Cphyto algorithm mostly came from Open Ocean, where the phytoplankton is the main particle; however, when it is not the case (usually refer to Case II water), I think the algorithm may not be suitable here, unless in this study area the backscatter signal mainly come from phytoplankton. And also, the author didn't provide the description of how they correct the backscatter data, so I would suggest authors to remove the phytoplankton carbon part.

The sentence has been removed.

Page 7, line 25, table 2: previously I thought NPQ should be highly correlated with surface PAR, but actually from the results in table 2 we can found obvious "decoupling" exists within these two parameters. For example the second 24 hours 20:00, when the PAR is only 24, the NPQ value is actually higher than the NPQ at first 24 hours 12:00, when the PAR is 1054, do authors know the reason?

We apologize, the high NPQ(500) value given for the time-point 20:00 on the second day in table 2 was a typo. Nonetheless, the correct value, 2.23, is still higher than the value recorded for the 12:00 time-point on the first day (1.89), as the referee points out correctly.

Hysteresis is a common phenomenon in all aspects of photosynthesis at the molecular level, in particular on the diurnal scale. The fact that the potential for NPQ is higher at 20:00 on day 2 than at 12:00 on day one can be very simply explained by the daily photon-dose received by the phytoplankton at this point (See Figure 3a for reference).

Page 11, line 8: can you explain the reason of what may potentially cause mid-day ETR at OSP14 exceeds the maximum theoretical value

The important point here is that mid-day ETR exceeds the maximum level of **linear** electron transport. The fate of electrons not used for linear electron transport is described in some detail in the paragraph just following the sentence in question.

Page 11, line 8: as authors mentioned, the weak part of this MS is figure 7c, which is not very easy for primary productivity people to understand. It is telling that at OSP14, even water dominated by smaller phytoplankton and has nutrient limitation; it still has higher PB, which I think against most of the primary production research. Although it might be explained by NPP/GPP reason, I suggest in the future study authors should try to give or adjust the primary productivity rate to same level, for example, also measure respiration rate at same time.

We thank the referee for this suggestion.

Page 11, line 26:-27 adding some references here?

This statement is not so much based on references, but on the data presented in the present and previous studies. We added “We argue based on the results present here, and in Schuback et al. (2014; 2015; 2017),...” in front of the sentence, to clarify this further.

technical corrections

Page 2 line 25: “we examined diurnal variability. . . . .”

Corrected.

Page 3, line 29: I cannot find Burt et al. (2018) in references.

(Burt et al., 2018)

Corrected.

Page 7, line 3 and Page 11, line 4: typing errors, “NQP” should be “NPQ”

Corrected.

Page 11, line 11 and 14, should be Fig 7d

Corrected.

Page 11, line 15, Fig 7e is missing here

Corrected.

Page 23, Figure 2: typing errors, “OSM14” in figure should be “OSP14”

Corrected.

Page 24, Table 1: method column, fourth item, “. . . . .weighted to spectral distribution of in situ light”

Corrected.

Page 32 Figure 7: missing x-axis label

Corrected.

Page 28, 32, Figure 4 and 7. The unit for <sup>14</sup>C-uptake should be per hour, not per second

Corrected.

## References

- Burt, W. J., Westberry, T. K., Behrenfeld, M. J., Zeng, C., Izett, R. W. and Tortell, P. D.: Carbon : Chlorophyll ratios and net primary productivity of Subarctic Pacific surface waters derived from autonomous shipboard sensors, *Global Biogeochem. Cycles*, doi:10.1002/2017GB005783, 2018.
- Huner, N. P. ., Öquist, G. and Sarhan, F.: Energy balance and acclimation to light and cold, *Trends Plant Sci.*, 3(6), 224–230, doi:10.1016/S1360-1385(98)01248-5, 1998.
- Kromkamp, J. C. and Forster, R. M.: The use of variable fluorescence measurements in aquatic ecosystems: Differences between multiple and single turnover measuring protocols and suggested terminology, *Eur. J. Phycol.*, 38(2), 103–112, doi:10.1080/0967026031000094094, 2003.
- Strzepek, R. F. and Harrison, P. J.: Photosynthetic architecture differs in coastal and oceanic diatoms, *Nature*, 431(7009), 689–692, doi:10.1038/nature02954, 2004.
- Suggett, D. J., MacIntyre, H. L. and Geider, R. J.: Evaluation of biophysical and optical determinations of light absorption by photosystem II in phytoplankton, *Limnol. Oceanogr. Methods*, 2(10), 316–332, doi:10.4319/lom.2004.2.316, 2004.
